# Supplementary material for: Decoupled ion conduction in poly(2-acrylamido-2-methyl-1-propane-sulfonic acid) homopolymers
Source: Royal Society of Chemistry journal article supplement (doi:10.1039/c4ta03998j), 2014-01-01
Supplement: c4ta03998j1.pdf [file c4ta03998j1.pdf]

## Supporting Information

### Decoupled ion conduction in poly(2-acrylamido 2methyl-1-propane-sulfonic acid) homopolymers

Siti Aminah Mohd Noor,<sup>a,b</sup> Jiazeng Sun,<sup>a</sup> Douglas R MacFarlane<sup>a,c</sup>, M. Armand<sup>d</sup>, D. Gunzelmann<sup>e</sup> and Maria Forsyth,<sup>c,e</sup>

<sup>a</sup> School of Chemistry, Monash University, Clayton Campus, Victoria, Australia

<sup>b</sup> Chemistry Department, Centre for Defence Foundation Studies, National Defence University of Malaysia, 57000, Kuala Lumpur, Malaysia

<sup>c</sup> ARC Centre of Excellence for Electromaterials Science (ACES), Australia

<sup>d</sup> CIC Energigune, Vitoria, Spain

<sup>e</sup> Institute for Frontier Materials Deakin University, Victoria, Australia

\* Corresponding Author: \*Email:aminah.mohd.noor@monash.edu;  
mforsyth@deakin.edu.au

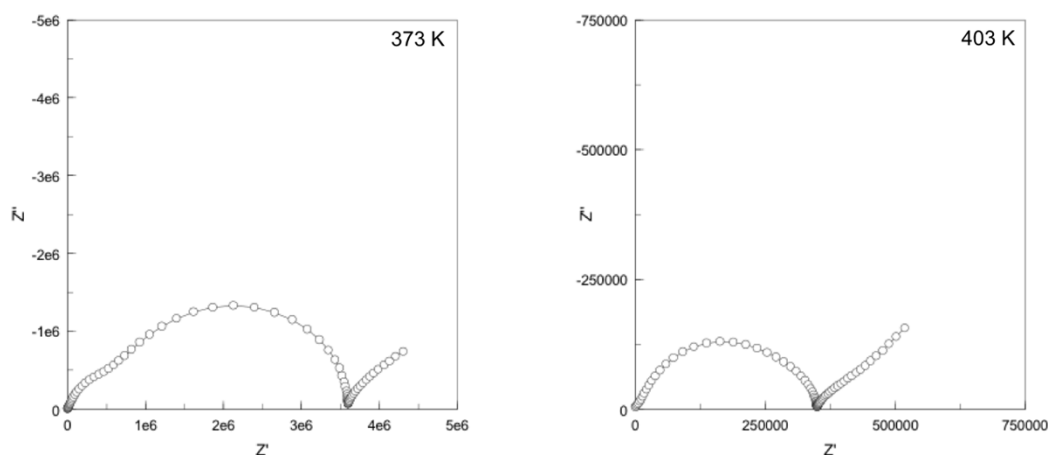

**Fig S1** Nyquist plots of (poly(N<sub>1222</sub>)<sub>0.9</sub>Na<sub>0.1</sub>[AMPS]). Na at 303 K and 403 K

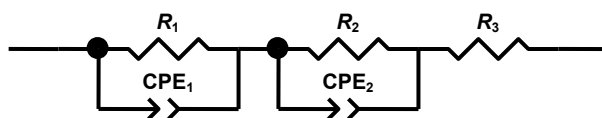

**Fig S2** Series circuit for fitting two semi-circles of impedance data

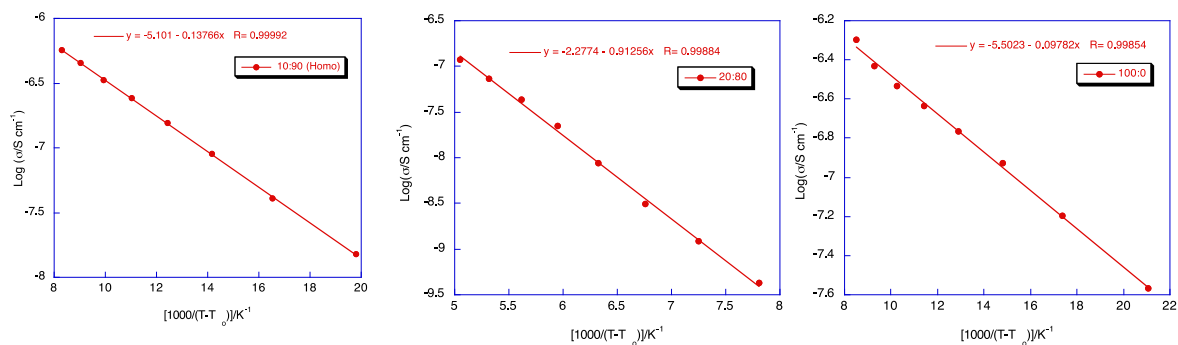

**Fig S3** Plot of log conductivity versus  $1000/(T-T_0)$  of poly((N<sub>1222</sub>)<sub>0.9</sub>Na<sub>0.1</sub>[AMPS])

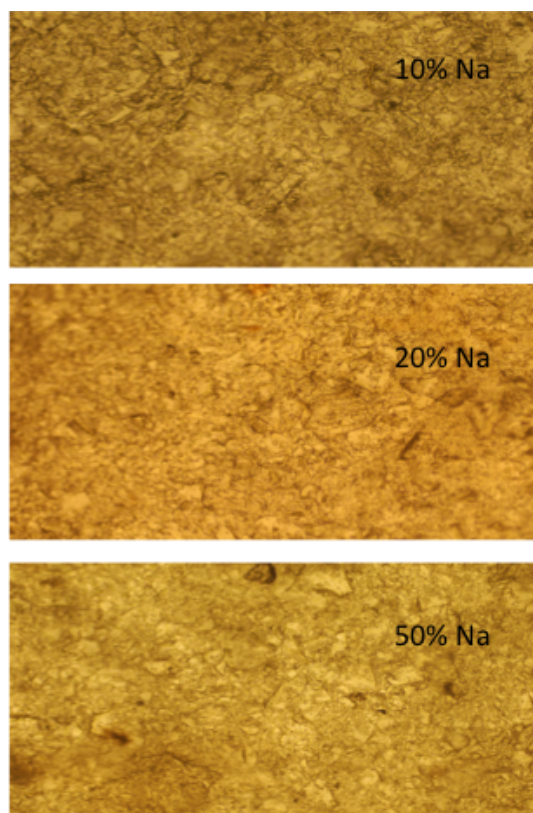

**Fig S4** Optical microscope images of (Poly(N<sub>1222</sub>)<sub>z</sub>Na<sub>1-z</sub>[AMPS]) ionomers with various mol% of Na (a) 10% (b) 20% (c) 50%.

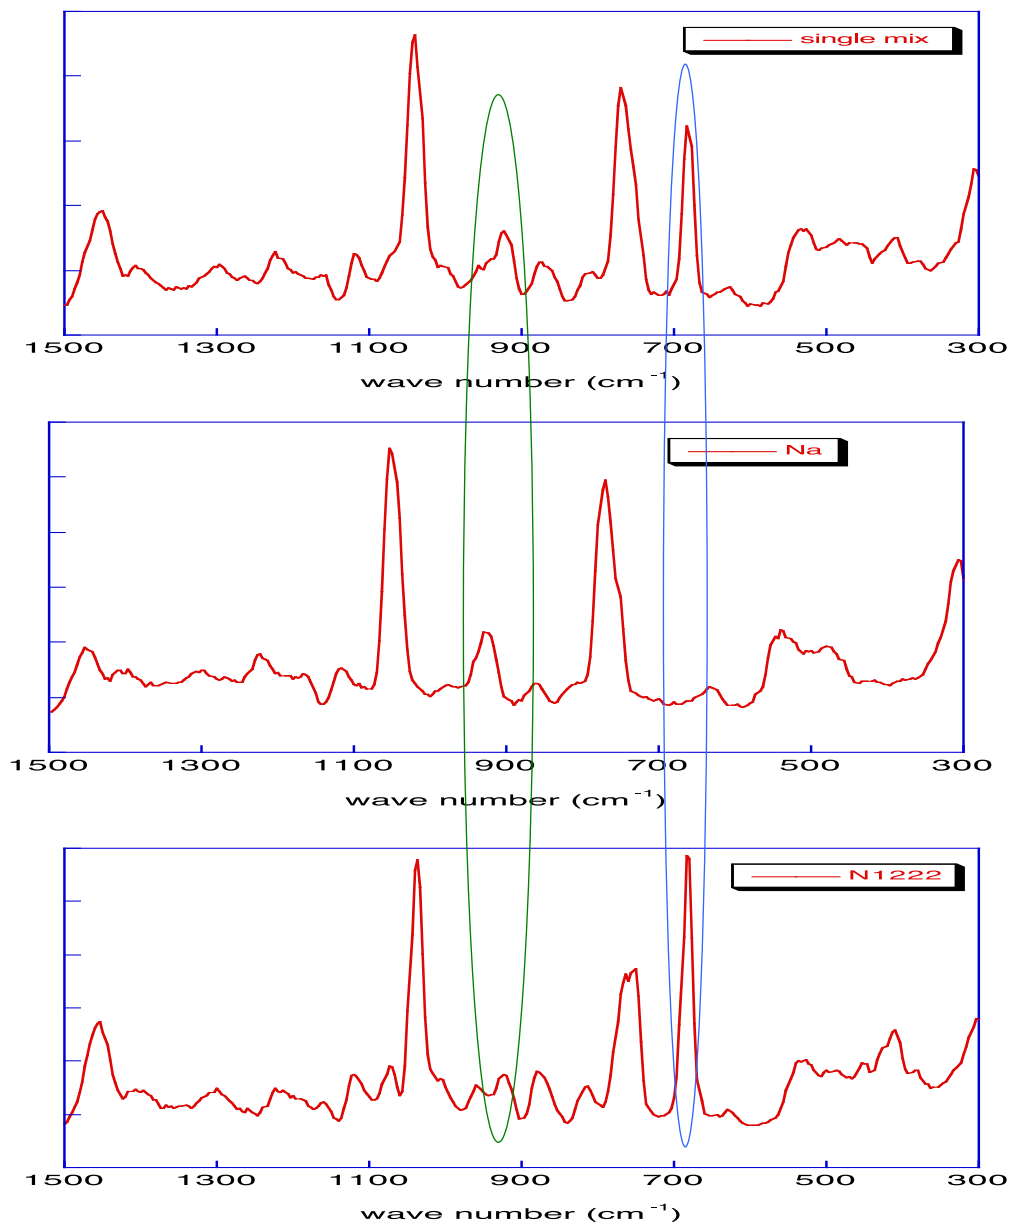

**Fig S5** Raman spectra of (Poly(N<sub>1222</sub>)<sub>z</sub>Na<sub>1-z</sub>[AMPS]), z=1.0, 0.5, and 0.0

Table S1 Examples of fitting parameters of series circuit for fitting two semi-circles of impedance data

| Sample                                                             | Temperature (K) | Element | Value   | Error (%) |
|--------------------------------------------------------------------|-----------------|---------|---------|-----------|
| Poly((N <sub>1222</sub> ) <sub>0.9</sub> Na <sub>0.1</sub> [AMPS]) | 373             | R1      | 6.3E5   | 6.8       |
|                                                                    |                 | CPE1-T  | 2.9E-11 | 11.6      |
|                                                                    |                 | CPE1-P  | 0.9     | 0.9       |
|                                                                    |                 | R2      | 3.0E6   | 1.7       |
|                                                                    |                 | CPE2-T  | 5.2E-11 | 8.2       |
|                                                                    |                 | CPE2-P  | 0.9     | 1.1       |
| Poly((N <sub>1222</sub> ) <sub>0.9</sub> Na <sub>0.1</sub> [AMPS]) | 383             | R1      | 4.3E5   | 9.0       |
|                                                                    |                 | CPE1-T  | 2.2E-11 | 12.7      |
|                                                                    |                 | CPE1-P  | 0.9     | 1.0       |
|                                                                    |                 | R2      | 9.0E5   | 4.5       |
|                                                                    |                 | CPE2-T  | 6.2E-11 | 10.0      |
|                                                                    |                 | CPE2-P  | 0.9     | 1.6       |
| Poly((N <sub>1222</sub> )[AMPS])                                   | 373             | R1      | 1.8E6   | 5.4       |
|                                                                    |                 | CPE1-T  | 5.8E-11 | 11.4      |
|                                                                    |                 | CPE1-P  | 0.9     | 1.9       |
|                                                                    |                 | R2      | 1.1E6   | 8.3       |
|                                                                    |                 | CPE2-T  | 2.3E-11 | 11.3      |
|                                                                    |                 | CPE2-P  | 0.8     | 0.9       |
